# Supplementary material for: Systematic, early rhythm control strategy for atrial fibrillation in patients with or without symptoms: the EAST-AFNET 4 trial
Source: PubMed Central journal article supplement (PMC8934687; doi:10.1093/eurheartj/ehab593), 2021-08-27
Supplement: ehab593_supplementary_data.pdf [file ehab593_supplementary_data.pdf]

**Systematic, early rhythm control therapy equally improves outcomes in asymptomatic and symptomatic patients with atrial fibrillation: the EAST-AFNET 4 Trial**

**DATA SUPPLEMENT**

**Table 1. Number of patients split by randomized group and EHRA score at baseline**

|                  | Overall, N = 2,789 <sup>1</sup> | Early rhythm control, N = 1395 <sup>1</sup> | Usual care, N = 1394 <sup>1</sup> | p-value <sup>2</sup> |
|------------------|---------------------------------|---------------------------------------------|-----------------------------------|----------------------|
| EHRA at baseline |                                 |                                             |                                   | 0.455                |
| I                | 801 (30%)                       | 395 (30%)                                   | 406 (31%)                         |                      |
| II               | 1,358 (52%)                     | 666 (51%)                                   | 692 (52%)                         |                      |
| III              | 447 (17%)                       | 230 (18%)                                   | 217 (16%)                         |                      |
| IV               | 27 (1.0%)                       | 14 (1.1%)                                   | 13 (1.0%)                         |                      |
| Unknown          | 156                             | 90                                          | 66                                |                      |

<sup>1</sup> n (%)

<sup>2</sup> Comparison between the different treatment groups were performed using mixed ordinal regression with site as random effect.

**Table 2. Demographic and clinical characteristics of the patients at Baseline, split into asymptomatic and symptomatic patients**

|                                                      | Asymptomatic AF                              |                  | Symptomatic AF       |                   | p (asymp vs. symp) |
|------------------------------------------------------|----------------------------------------------|------------------|----------------------|-------------------|--------------------|
|                                                      | Early rhythm control                         | Usual care       | Early rhythm control | Usual care        |                    |
| n                                                    | 395                                          | 406              | 910                  | 922               |                    |
|                                                      | <b>Characteristics</b>                       |                  |                      |                   |                    |
| Age (mean (SD))                                      | 71.0 (8.0)                                   | 71.5 (7.9)       | 70.0 (8.5)           | 70.0 (8.3)        | 0.002              |
| Women                                                | 138 (34.9)                                   | 162 (39.9)       | 470 (51.6)           | 453 (49.1)        | <0.001             |
| Body Mass Index (mean (SD))                          | 29.0 (5.1)                                   | 29.5 (5.6)       | 29.2 (5.5)           | 29.3 (5.3)        | 0.689              |
| AF type                                              |                                              |                  |                      |                   | <0.001*            |
| First episode                                        | 195/395 (49.4)                               | 195/406 (48.0)   | 322/910 (35.4)       | 317/922 (34.4)    |                    |
| Paroxysmal                                           | 103/395 (26.1)                               | 98/406 (24.1)    | 347/910 (38.1)       | 353/922 (38.3)    |                    |
| Persistent or long-standing persistent               | 97/395 (24.6)                                | 113/406 (27.8)   | 241/910 (26.5)       | 252/922 (27.3)    |                    |
| Median days since first diagnosis of AF(IQR)         | 21.0 (4.0,79.0)                              | 23.5 (4.0, 96.0) | 40.0 (7.0, 121.8)    | 40.0 (6.0, 118.8) | 0.002              |
| Previous pharmacological or electrical cardioversion | 133/385 (34.5)                               | 143/403 (35.5)   | 388/894 (43.4)       | 382/920 (41.5)    | <0.001             |
| Ventricular rate in AF (average of 10 intervals)     | 92.2 (26.2)                                  | 94.8 (27.7)      | 95.7 (24.9)          | 100.5 (28.2)      | 0.019              |
|                                                      | <b>Concomitant cardiovascular conditions</b> |                  |                      |                   |                    |
| Previous stroke or transient ischemic attack         | 61/395 (15.4)                                | 55/406 (13.5)    | 100/910 (11.0)       | 87/922 ( 9.4)     | 0.003              |
| At least mild cognitive impairment                   | 183/384 (47.7)                               | 200/393 (50.9)   | 368/864 (42.6)       | 359/883 (40.7)    | 0.02               |
| MoCA Score                                           |                                              |                  |                      |                   | 0.008              |
| None                                                 | 201 / 384 (52)                               | 193 / 393 (49)   | 496 / 864 (57)       | 524 / 883 (59)    |                    |
| Mild                                                 | 170 / 384 (44)                               | 173 / 393 (44)   | 334 / 864 (39)       | 339 / 883 (38)    |                    |
| Moderate                                             | 13 / 384 (3.4)                               | 25 / 393 (6.4)   | 30 / 864 (3.5)       | 18 / 883 (2.0)    |                    |
| Severe                                               | 0 / 384 (0)                                  | 2 / 393 (0.5)    | 4 / 864 (0.5)        | 2 / 883 (0.2)     |                    |
| Arterial hypertension                                | 338/395 (85.6)                               | 355/406 (87.4)   | 810/910 (89.0)       | 803/922 (87.1)    | 0.348              |
| Systolic blood pressure (mean (SD))                  | 136.7 (19.6)                                 | 138.3 (18.9)     | 136.6 (19.5)         | 137.0 (19.4)      | 0.602              |
| Diastolic blood pressure (mean (SD))                 | 80.5 (12.7)                                  | 81.4 (12.2)      | 81.0 (11.8)          | 81.2 (11.9)       | 0.739              |
| Stable heart failure                                 | 81/395 (20.5)                                | 88/406 (21.7)    | 278/910 (30.5)       | 291/922 (31.6)    | <0.001             |

|                                                   | Asymptomatic AF      |                | Symptomatic AF       |                | p (asymp vs. symp) |
|---------------------------------------------------|----------------------|----------------|----------------------|----------------|--------------------|
|                                                   | Early rhythm control | Usual care     | Early rhythm control | Usual care     |                    |
| CHA2DS2-VASc score (mean (SD))                    | 3.4 (1.3)            | 3.4 (1.4)      | 3.3 (1.3)            | 3.3 (1.3)      | 0.558              |
| Chronic kidney disease of MDRF stage 3 or 4       | 47/395 (11.9)        | 57/406 (14.0)  | 115/910 (12.6)       | 118/922 (12.8) | 0.99               |
| <b>Medication at discharge</b>                    |                      |                |                      |                |                    |
| Oral anticoagulation with NOAC or VKA             | 351/395 (88.9)       | 372/406 (91.6) | 838/910 (92.1)       | 817/922 (88.6) | 0.095              |
| Digoxin or digitoxin                              | 9/395 ( 2.3)         | 15/406 ( 3.7)  | 35/910 ( 3.8)        | 70/922 ( 7.6)  | 0.001              |
| Beta blockers                                     | 282/395 (71.4)       | 342/406 (84.2) | 711/910 (78.1)       | 795/922 (86.2) | 0.004              |
| ACE inhibitors or angiotensin II receptor blocker | 286/395 (72.4)       | 294/406 (72.4) | 616/910 (67.7)       | 642/922 (69.6) | 0.201              |
| Mineralocorticoid receptor antagonist             | 23/395 ( 5.8)        | 30/406 ( 7.4)  | 60/910 ( 6.6)        | 57/922 ( 6.2)  | 0.612              |
| Diuretic                                          | 156/395 (39.5)       | 166/406 (40.9) | 376/910 (41.3)       | 369/922 (40.0) | 0.581              |
| Statin                                            | 210/395 (53.2)       | 189/406 (46.6) | 384/910 (42.2)       | 356/922 (38.6) | <0.001             |
| Platelet inhibitor                                | 79/395 (20.0)        | 67/406 (16.5)  | 140/910 (15.4)       | 151/922 (16.4) | 0.153              |
| <b>AF Therapy</b>                                 |                      |                |                      |                |                    |
| Planned therapy for rhythm control at baseline    |                      |                |                      |                | 0.341*             |
| AAD                                               | 354/395 (89.6)       | 15/406 ( 3.7)  | 787/910 (86.5)       | 37/922 ( 4.0)  |                    |
| Ablation                                          | 24/395 ( 6.1)        | 1/406 ( 0.2)   | 78/910 ( 8.6)        | 1/922 ( 0.1)   |                    |
| None                                              | 17/395 ( 4.3)        | 390/406 (96.1) | 45/910 ( 4.9)        | 884/922 (95.9) |                    |

MoCA Score Categories: None : >= 26; Mild: 18-25; Moderate: 10-17; Severe: < 10

**Table 3: Outcomes split into symptomatic and asymptomatic patients and by randomized group.**

| Outcome                                                | Asymptomatic AF      |                |                     | Symptomatic AF       |                |                      | p-Value interaction |
|--------------------------------------------------------|----------------------|----------------|---------------------|----------------------|----------------|----------------------|---------------------|
|                                                        | Early rhythm control | Usual care     | Treatment effect    | Early rhythm control | Usual care     | Treatment effect     |                     |
| First primary outcome                                  | 79/1888 (4.2)        | 97/1774 (5.5)  | 0.76 (0.57, 1.03)   | 158/4155 (3.8)       | 205/4307 (4.8) | 0.79 (0.64, 0.98)    | 0.848               |
| <b>Components of the first primary outcome</b>         |                      |                |                     |                      |                |                      |                     |
| Death from cardiovascular causes                       | 19/2049 (0.9)        | 22/1977 (1.1)  | 0.82 (0.44, 1.51)   | 45/4485 (1)          | 66/4742 (1.4)  | 0.72 (0.49, 1.05)    | 0.723               |
| Stroke                                                 | 19/2005 (0.9)        | 25/1923 (1.3)  | 0.73 (0.4, 1.33)    | 20/4429 (0.5)        | 34/4670 (0.7)  | 0.62 (0.36, 1.08)    | 0.701               |
| Hospitalization with worsening of heart failure        | 39/1961 (2)          | 54/1845 (2.9)  | 0.67 (0.44, 1.01)   | 93/4289 (2.2)        | 108/4455 (2.4) | 0.89 (0.67, 1.18)    | 0.255               |
| Hospitalization with acute coronary syndrome           | 22/2004 (1.1)        | 18/1929 (0.9)  | 1.19 (0.64, 2.22)   | 28/4389 (0.6)        | 44/4619 (1)    | 0.67 (0.42, 1.08)    | 0.151               |
| Secondary primary outcome: Nights spent in hospital/yr | 5.5 (17.9)           | 6.1 (19.2)     | 0.91 (0.72, 1.16)   | 6.3 (24.4)           | 4.7 (14.2)     | 1.2 (1.03, 1.41)     | 0.061               |
| <b>Key secondary outcomes at 2 years follow-up</b>     |                      |                |                     |                      |                |                      |                     |
| Change in left ventricular ejection fraction           | 0.6 (10.4)           | -0.5 (9.8)     | 0.18 (-1, 1.36)     | 2 (9.7)              | 1.2 (9.8)      | 0.25 (-0.57, 1.07)   | 0.919               |
| Change in EQ-5D score                                  | 1.6 (16.7)           | -1.2 (17.2)    | 1.53 (-1.74, 4.8)   | 1.3 (17.6)           | 1.5 (16.8)     | 0.89 (-1.27, 3.05)   | 0.755               |
| Change in SF-12 Mental Score                           | 1 (9.7)              | 1.7 (9.5)      | -0.83 (-2.34, 0.67) | 0.8 (10.9)           | 1.7 (10.2)     | -1.36 (-2.33, -0.38) | 0.556               |
| Change in SF-12 Physical Score                         | -0.4 (8.3)           | -1.2 (8.4)     | 0.84 (-0.57, 2.24)  | 0.7 (8.5)            | 0.7 (8)        | 0.11 (-0.73, 0.95)   | 0.385               |
| Change in MoCA score                                   | 0.2 (3.4)            | 0.1 (3)        | 0.05 (-0.42, 0.53)  | 0 (3.2)              | 0.1 (3.3)      | -0.22 (-0.53, 0.09)  | 0.354               |
| Sinus rhythm                                           | 255/323 (78.9)       | 170/325 (52.3) | 3.66 (2.56, 5.24)   | 616/729 (84.5)       | 484/759 (63.8) | 2.93 (2.26, 3.79)    | 0.317               |

Note: Continuous variables were presented as the mean and standard deviation. See main paper for detailed description of the outcomes.
